# Supplementary material for: Comparison of Pre-Diagnosis Physical Activity and Its Correlates between Lung and Other Cancer Patients: Accelerometer Data from the UK Biobank Prospective Cohort
Source: MDPI journal article supplement (doi:10.3390/ijerph20021001), 2023-01-05
Supplement: s1 [file s1]

**Table 1.** ICD-9 and ICD-10 codes.

| Type of Cancer    | ICD-9 and ICD-10 Codes |       |       |       |       |       |       |       |       |       |      |      |
|-------------------|------------------------|-------|-------|-------|-------|-------|-------|-------|-------|-------|------|------|
| Lung cancer       | C34.0                  | C34.1 | C34.2 | C34.3 | C34.8 | C34.9 |       |       |       |       |      |      |
|                   | 1620                   | 1622  | 1623  | 1624  | 1625  | 1628  | 1629  |       |       |       |      |      |
| Breast cancer     | C50.0                  | C50.1 | C50.2 | C50.3 | C50.4 | C50.5 | C50.6 | C50.8 | C50.9 |       |      |      |
|                   | 1740                   | 1741  | 1742  | 1743  | 1744  | 1745  | 1746  | 1748  | 1749  |       |      |      |
| Colorectal cancer | C18.0                  | C18.1 | C18.2 | C18.3 | C18.4 | C18.5 | C18.6 | C18.7 | C18.8 | C18.9 | C19  | C20  |
|                   | 1530                   | 1531  | 1532  | 1533  | 1534  | 1535  | 1536  | 1537  | 1538  | 1539  | 1540 | 1541 |
| Prostate cancer   |                        |       |       |       |       |       |       |       |       |       | C61  | 185  |

**Table 2.** Correlates of time spent in MVPA (min/day) among lung, breast, colorectal and prostate cancer (Standardized coefficient).

|                               | Lung Cancer<br><i>Beta</i> | Breast Cancer<br><i>Beta</i> | Colorectal Cancer<br><i>Beta</i> | Prostate Cancer<br><i>Beta</i> |
|-------------------------------|----------------------------|------------------------------|----------------------------------|--------------------------------|
| Male (reference: female)      | 0.02                       | –                            | –0.03                            | –                              |
| Age at accelerometer study    | –0.34 ***                  | –0.26 ***                    | –0.30 ***                        | –0.29 ***                      |
| White (reference: non-white)  | –0.01                      | –0.01                        | –0.06                            | –0.03                          |
| Townsend Index of Deprivation | –0.09                      | –0.04                        | –0.03                            | 0.01                           |
| BMI                           |                            |                              |                                  |                                |
| Underweight                   | –0.07                      | 0.04                         | –0.04                            | 0.04                           |
| Normal                        | 0.00 (reference)           | 0.00 (reference)             | 0.00 (reference)                 | 0.00 (reference)               |
| Overweight                    | –0.05                      | –0.10 **                     | –0.07                            | –0.09 **                       |
| Obese                         | –0.09                      | –0.13 ***                    | –0.16 **                         | –0.15 ***                      |
| Smoking status                |                            |                              |                                  |                                |
| Never                         | 0.00 (reference)           | 0.00 (reference)             | 0.00 (reference)                 | 0.00 (reference)               |
| Previous                      | –0.09                      | 0.04                         | 0.12 *                           | 0.08 **                        |
| Current                       | –0.28 ***                  | –0.05                        | –0.02                            | –0.03                          |
| Alcohol drinking frequency    |                            |                              |                                  |                                |
| ≤1-3 times/month              | 0.00 (reference)           | 0.00 (reference)             | 0.00 (reference)                 | 0.00 (reference)               |
| 1-4 times/week                | 0.02                       | 0.09 *                       | 0.06                             | 0.05                           |
| Daily or almost daily         | 0.10                       | 0.09 *                       | 0.06                             | 0.02                           |
| Overall health rating         |                            |                              |                                  |                                |
| Excellent                     | 0.00 (reference)           | 0.00 (reference)             | 0.00 (reference)                 | 0.00 (reference)               |
| Good                          | 0.01                       | –0.01                        | –0.22                            | –0.05                          |
| Fair                          | –0.01                      | –0.05                        | –0.09                            | –0.10                          |
| Poor                          | –0.10                      | –0.07 *                      | –0.08                            | –0.10                          |
| No. of comorbidities          | –0.07                      | –0.04                        | –0.04                            | –0.07 *                        |
| Self-reported walking pace    |                            |                              |                                  |                                |
| Slow                          | 0.00 (reference)           | 0.00 (reference)             | 0.00 (reference)                 | 0.00 (reference)               |
| Steady or average             | 0.14                       | 0.19 *                       | 0.23 *                           | 0.16                           |
| Brisk                         | 0.26 **                    | 0.33 ***                     | 0.34 ***                         | 0.23 **                        |
| Grip strength (kg)            | –0.15                      | –0.05                        | –0.06                            | –0.07 *                        |
| Anxiety and depression        | –0.07                      | –0.03                        | 0.00                             | 0.02                           |

Note. \*  $p < 0.05$ , \*\*  $p < 0.01$ , \*\*\*  $p < 0.001$ .

**Table 3.** Interaction between cancer types and MVPA on all-cause mortality ( $n = 2,661$ ).

| Adjusted Hazard Ratio <sup>a</sup><br>( $n = 2,661$ , No. of events = 426) |                   |
|----------------------------------------------------------------------------|-------------------|
| Time in MVPA (hours/day)                                                   |                   |
| <1 hour (reference)                                                        | 1.0 (Reference)   |
| 1-1.5 hours                                                                | 0.93 (0.60, 1.43) |

---

|                                    |                       |
|------------------------------------|-----------------------|
| 1.5-2 hours                        | 0.82 (0.53, 1.27)     |
| ≥2 hours                           | 0.72 (0.41, 0.24)     |
| Cancer type                        |                       |
| Lung cancer (reference)            | 1.0 (Reference)       |
| Female breast cancer               | 0.09 (0.05, 0.19) *** |
| Colorectal cancer                  | 0.36 (0.23, 0.55) *** |
| Prostate cancer                    | 0.09 (0.05, 0.15) *** |
| Cancer type # time in MVPA         |                       |
| Female breast cancer × 1-1.5 hours | 0.94 (0.39, 2.30)     |
| Female breast cancer × 1.5-2 hours | 0.86 (0.34, 2.17)     |
| Female breast cancer × ≥2 hours    | 0.54 (0.20, 1.49)     |
| Colorectal cancer × 1-1.5 hours    | 1.05 (0.57, 1.94)     |
| Colorectal cancer × 1.5-2 hours    | 0.56 (0.28, 1.13)     |
| Colorectal cancer × ≥2 hours       | 0.85 (0.41, 1.77)     |
| Prostate cancer × 1-1.5 hours      | 0.78 (0.39, 1.58)     |
| Prostate cancer × 1.5-2 hours      | 0.88 (0.43, 1.79)     |
| Prostate cancer × ≥2 hours         | 0.69 (0.31, 1.53)     |

---

Note. <sup>a</sup> Adjusted for gender, age, race, Townsend Index of deprivation, BMI, smoking status, alcohol drinking frequency and comorbidities (diabetes, heart attack, angina, stroke, hypertension, COPD and asthma). \*\*\*  $p < 0.001$ .
